# Supplementary material for: Synthesis of a green [60]fullerene derivative through cage-opening reactions
Source: Royal Society of Chemistry journal article supplement (doi:10.1039/c2cc17164c), 2012-01-01
Supplement: c2cc17164c.pdf [file c2cc17164c.pdf]

# Synthesis of Green [60]Fullerene Derivative through Cage-Opening Reactions

Shuming Liu,<sup>a,b,d</sup> Changqi Zhang,<sup>a,c</sup> Xiang Xie,<sup>a,c</sup> Yuming Yu,<sup>a,b</sup> Zhifei Dai,<sup>a,c</sup> Yanhua Shao,<sup>a,c</sup> Liangbing Gan <sup>\*a,b,c</sup> and Yuliang Li <sup>a,b</sup>

<sup>a</sup> Beijing National Laboratory for Molecular Sciences, <sup>b</sup>CAS Key Laboratory for Organic Solids, Institute of Chemistry, Chinese Academy of Sciences, Beijing 100080, China and

<sup>c</sup>Key Laboratory of Bioorganic Chemistry and Molecular Engineering of the Ministry of Education, College of Chemistry and Molecular Engineering, Peking University, Beijing 100871, <sup>d</sup> Department of Chemistry, Handan College, 056005, China

## Content

|                                                                                   |        |
|-----------------------------------------------------------------------------------|--------|
| Experimetal details and proposed mechanism for formation of compound <b>3</b>     | S2-3   |
| <sup>1</sup> H NMR, HRMS and IR spectra for compound <b>1</b>                     | S4-5   |
| <sup>1</sup> H and <sup>13</sup> C NMR, HRMS and IR spectra for compound <b>2</b> | S6-10  |
| <sup>1</sup> H NMR, HRMS and IR spectra for compound <b>3</b>                     | S11-13 |
| UV-Vis spectra of compounds <b>1</b> , <b>2</b> and <b>3</b>                      | S14-15 |
| DPV spectra of <b>1</b> , <b>2</b> , <b>3</b>                                     | S16    |

Compound **1** was prepared according to the same procedure as in Zhang, Q. Y.; Jia, Z. S.; Liu, S. M.; Zhang, G.; Xiao, Z.; Yang, D. Z.; Gan, L. B.; Wang, Z. M.; Li, Y. L. *Org. Lett.*, **2009**, *11*, 2772.

### Electrochemical measurements

A conventional three-electrode system is used, with a platinum ultra-microelectrode (Pt UME, diameter: 25  $\mu\text{m}$ ) as the working electrode, a platinum wire and a Ag wire as the counter and quasi-reference electrodes, respectively. Ferrocene served as an internal standard. Before being used, the Pt UME was polished using alumina powder with 0.05  $\mu\text{m}$ , and then sonicated in ethanol and water for 3 minutes, respectively. DPV measurements were carried out in toluene solution containing 0.05 mol/L THA-Tf<sub>2</sub>N as supporting electrolyte (Scan rate: 20 mVs<sup>-1</sup>). All the solutions were purged with argon for at least 25 minutes to remove oxygen prior to experiments. All experiments were carried out at room temperature (22  $\pm$  2 °C).

### Proposed mechanism for the conversion of compound **2** to **3**

The mechanism probably starts from protonation of the imino nitrogen next to the lactone carbonyl group to form intermediate **A**. The regio-selectivity is due to favourable intramolecular H-bond formation. It is well known that iodine does not form strong bond to fullerene. Iodofullerene derivatives are quite rare.<sup>1</sup> Thus I and OH groups in **B** were readily eliminated through **C** to form **D**. The final step from **D** to **3** is a facile intramolecular Friedel-Crafts process, which is facilitated by the flexible amino group instead of the rigid imino group in the precursor and by formation of a six-membered ring. Lewis acid mediated Friedel-Crafts hydroarylation of C<sub>60</sub> has been reported to form isomerically pure multiadducts selectively.<sup>2</sup>

Alternatively, the conversion may undergo an iodide mediated reductive aromatization process to eliminate the two OH groups in **2**, followed by a proton catalyzed cyclizing isomerization process. As above, the regio-selectivity is due to favourable intramolecular H-bond formation. (we thank one of the reviewers for proposing this mechanism).

1 For a rare example see: S. H. Huang, X. B. Yang, X. Zhang, X. Q. Hu, L. B. Gan, S. W. Zhang, *Synlett* 2006, **8**, 1266.

2 A. Iwashita, Y. Matsuo, E. Nakamura, *Angew. Chem. Int. Ed.* 2007, **46**, 3513.

Or

**Scheme** Possible mechanisms for HI induced reactions

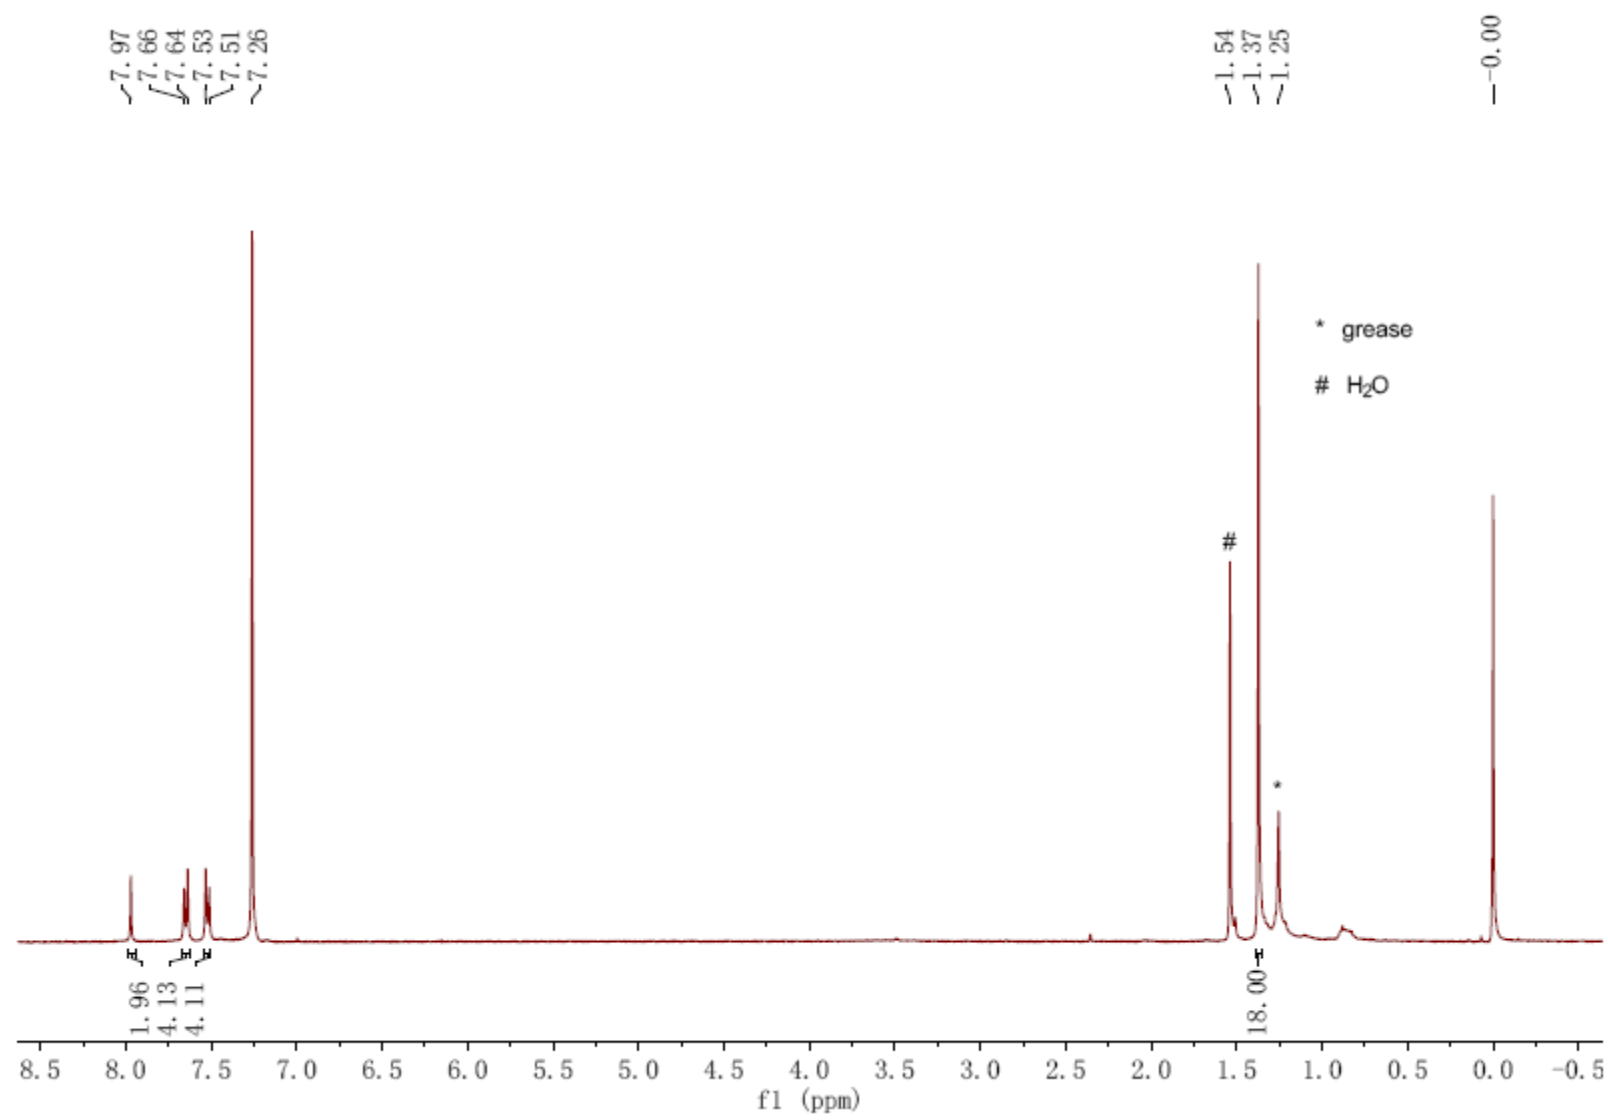

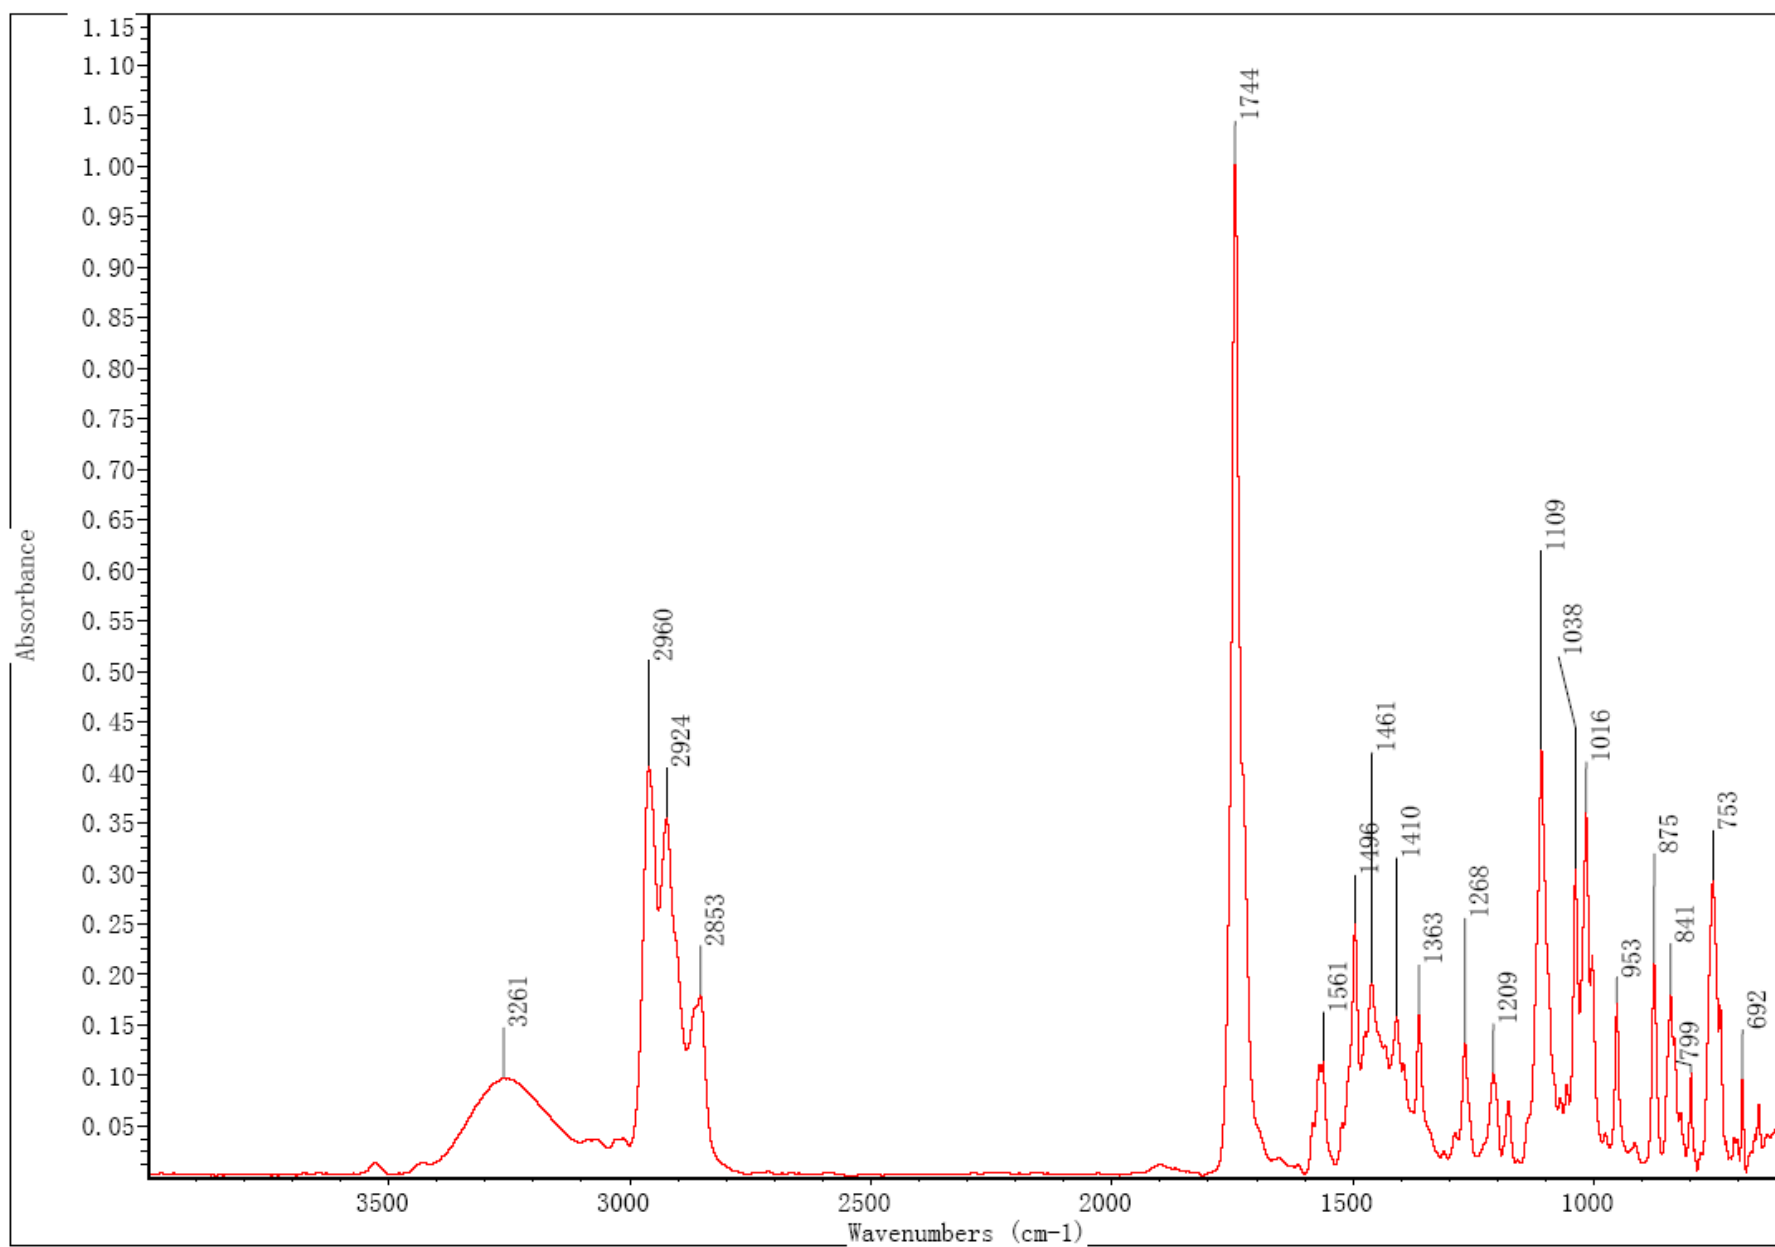

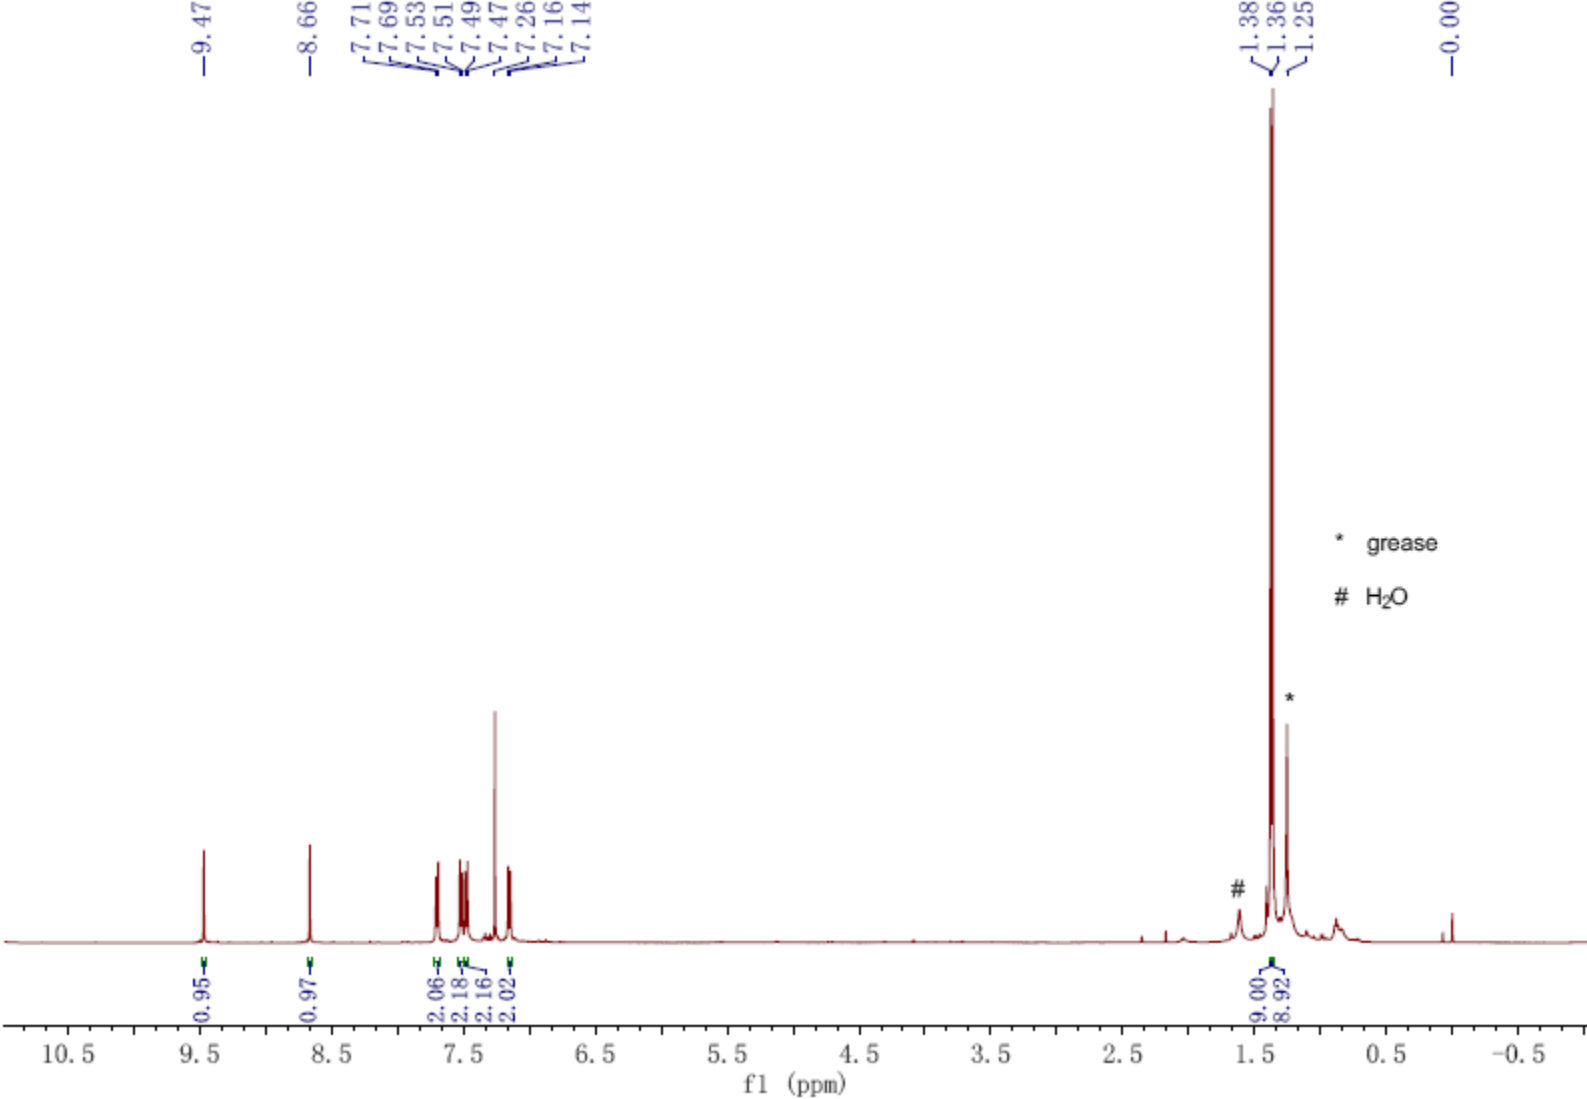

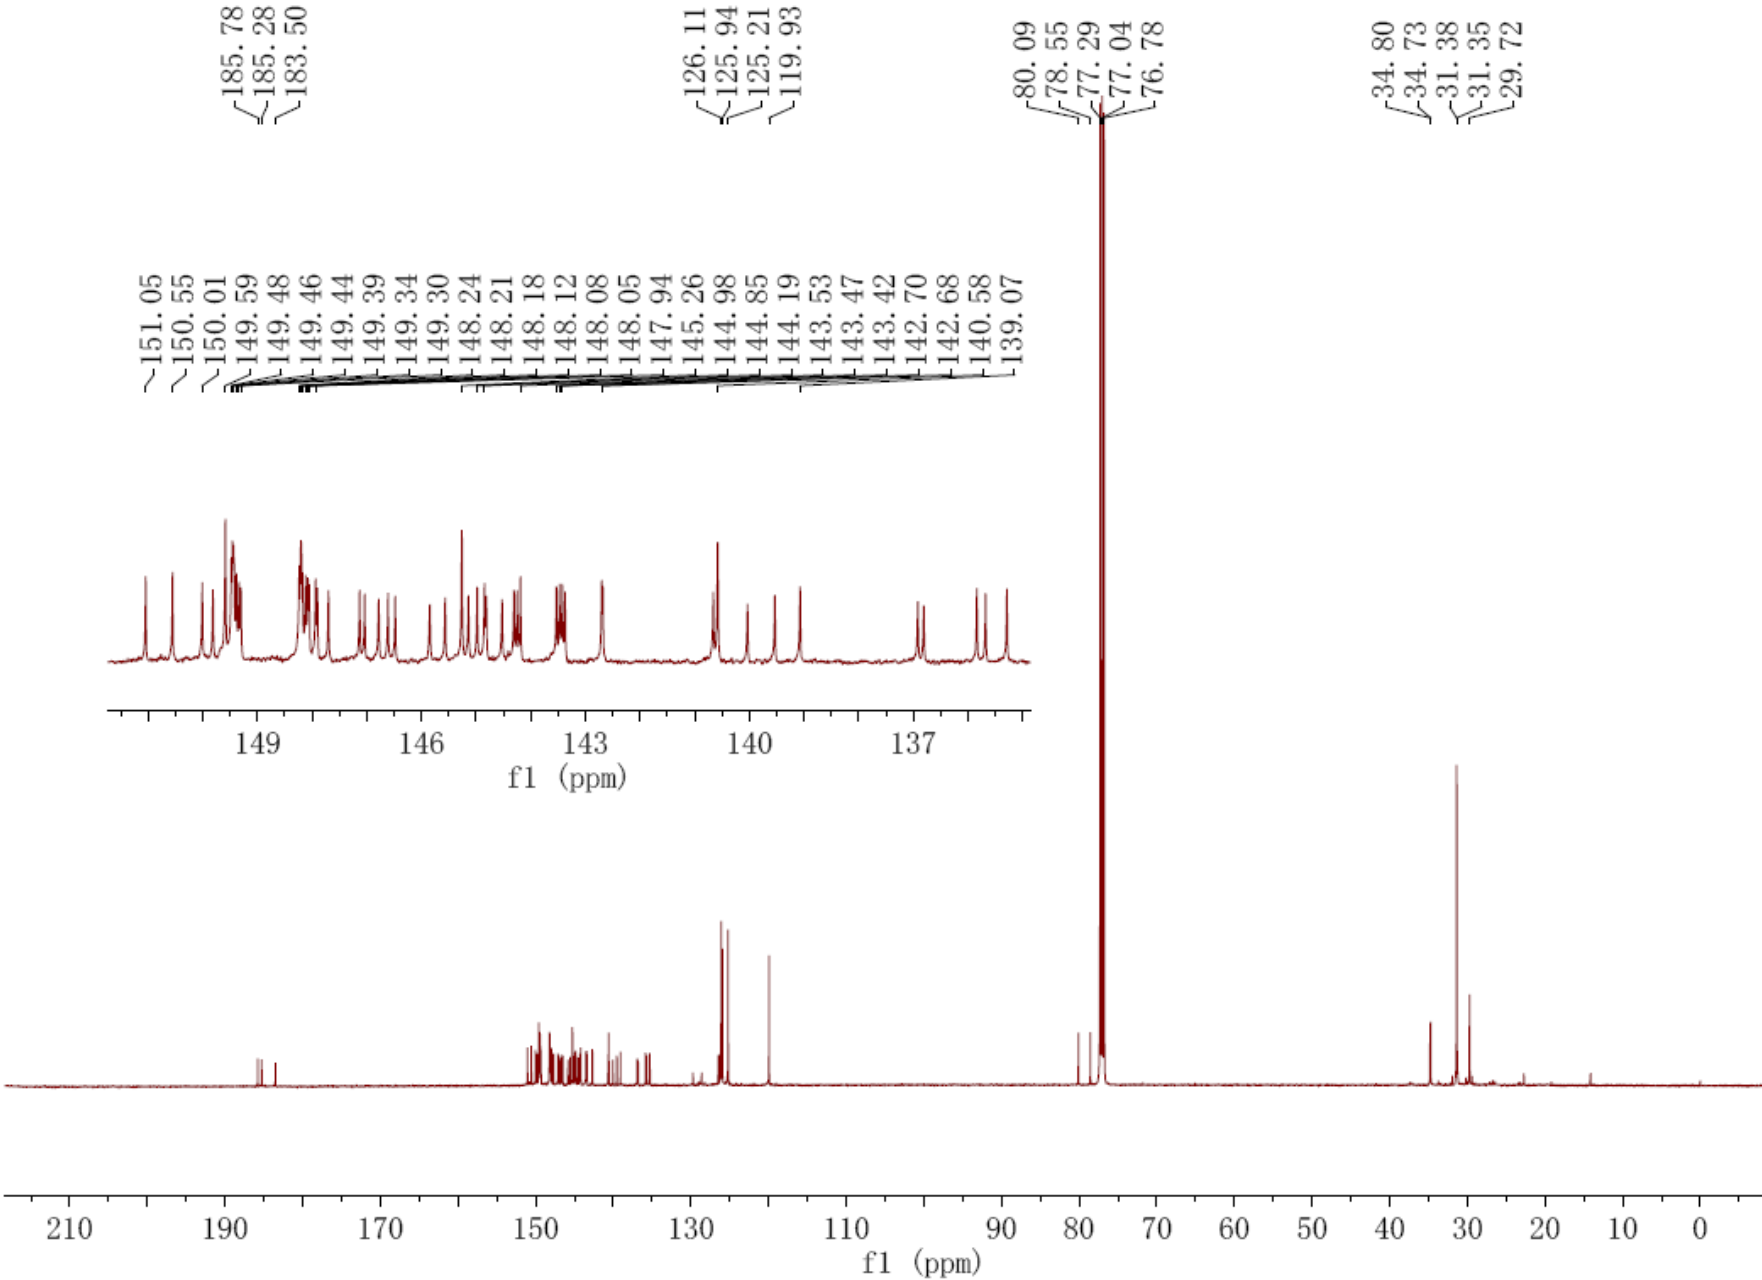

## Peking University Mass Spectrometry Analysis Report

### Analysis Info

Analysis Name 10030549\_20100325\_000001.d  
Sample lsm tBu ICI pro  
Comment ESI Positive

Acquisition Date 3/25/2010 9:30:51 AM  
Instrument Bruker Apex IV FTMS  
Operator Peking University

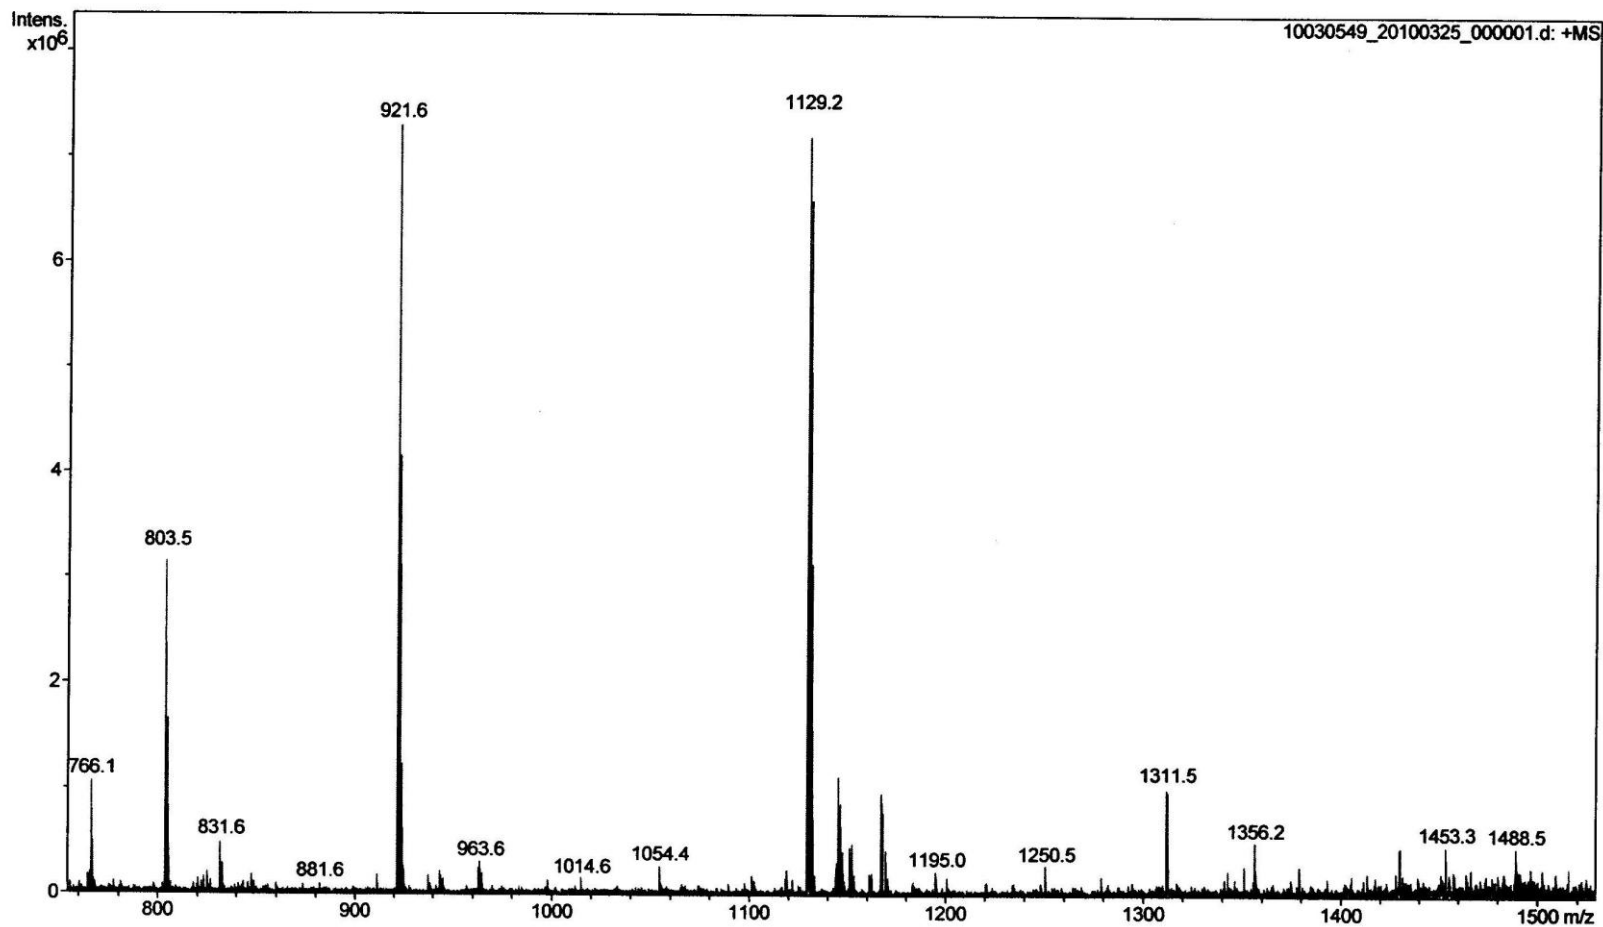



## Peking University Mass Spectrometry Sample Analysis Report

### Analysis Info

Analysis Name 10040018\_20100401\_000001.d  
Sample 4tBu ICI Pro  
Comment ESI Positive

Acquisition Date 4/1/2010 11:53:40 AM  
Instrument Bruker Apex IV FTMS  
Operator Peking University

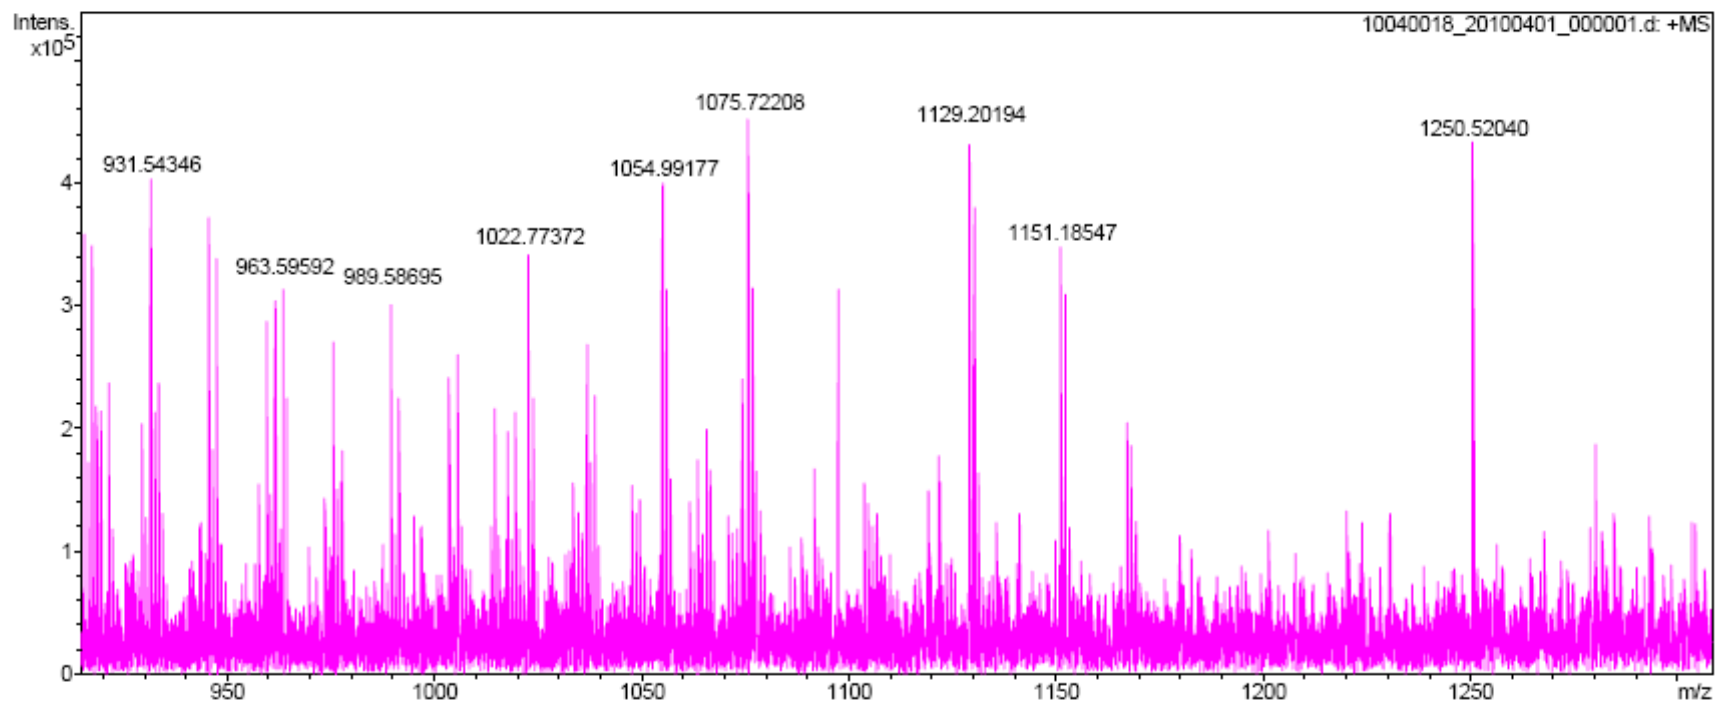

| Meas. m/z  | # | Formula           | Score | m/z        | err [mDa] | err [ppm] | mSigma | rdb  | e <sup>-</sup> | Conf | N-Rule |
|------------|---|-------------------|-------|------------|-----------|-----------|--------|------|----------------|------|--------|
| 1129.20194 | 1 | C 80 H 29 N 2 O 7 | 6.97  | 1129.19693 | -5.0      | -4.4      | 167.2  | 67.5 | even           |      | ok     |

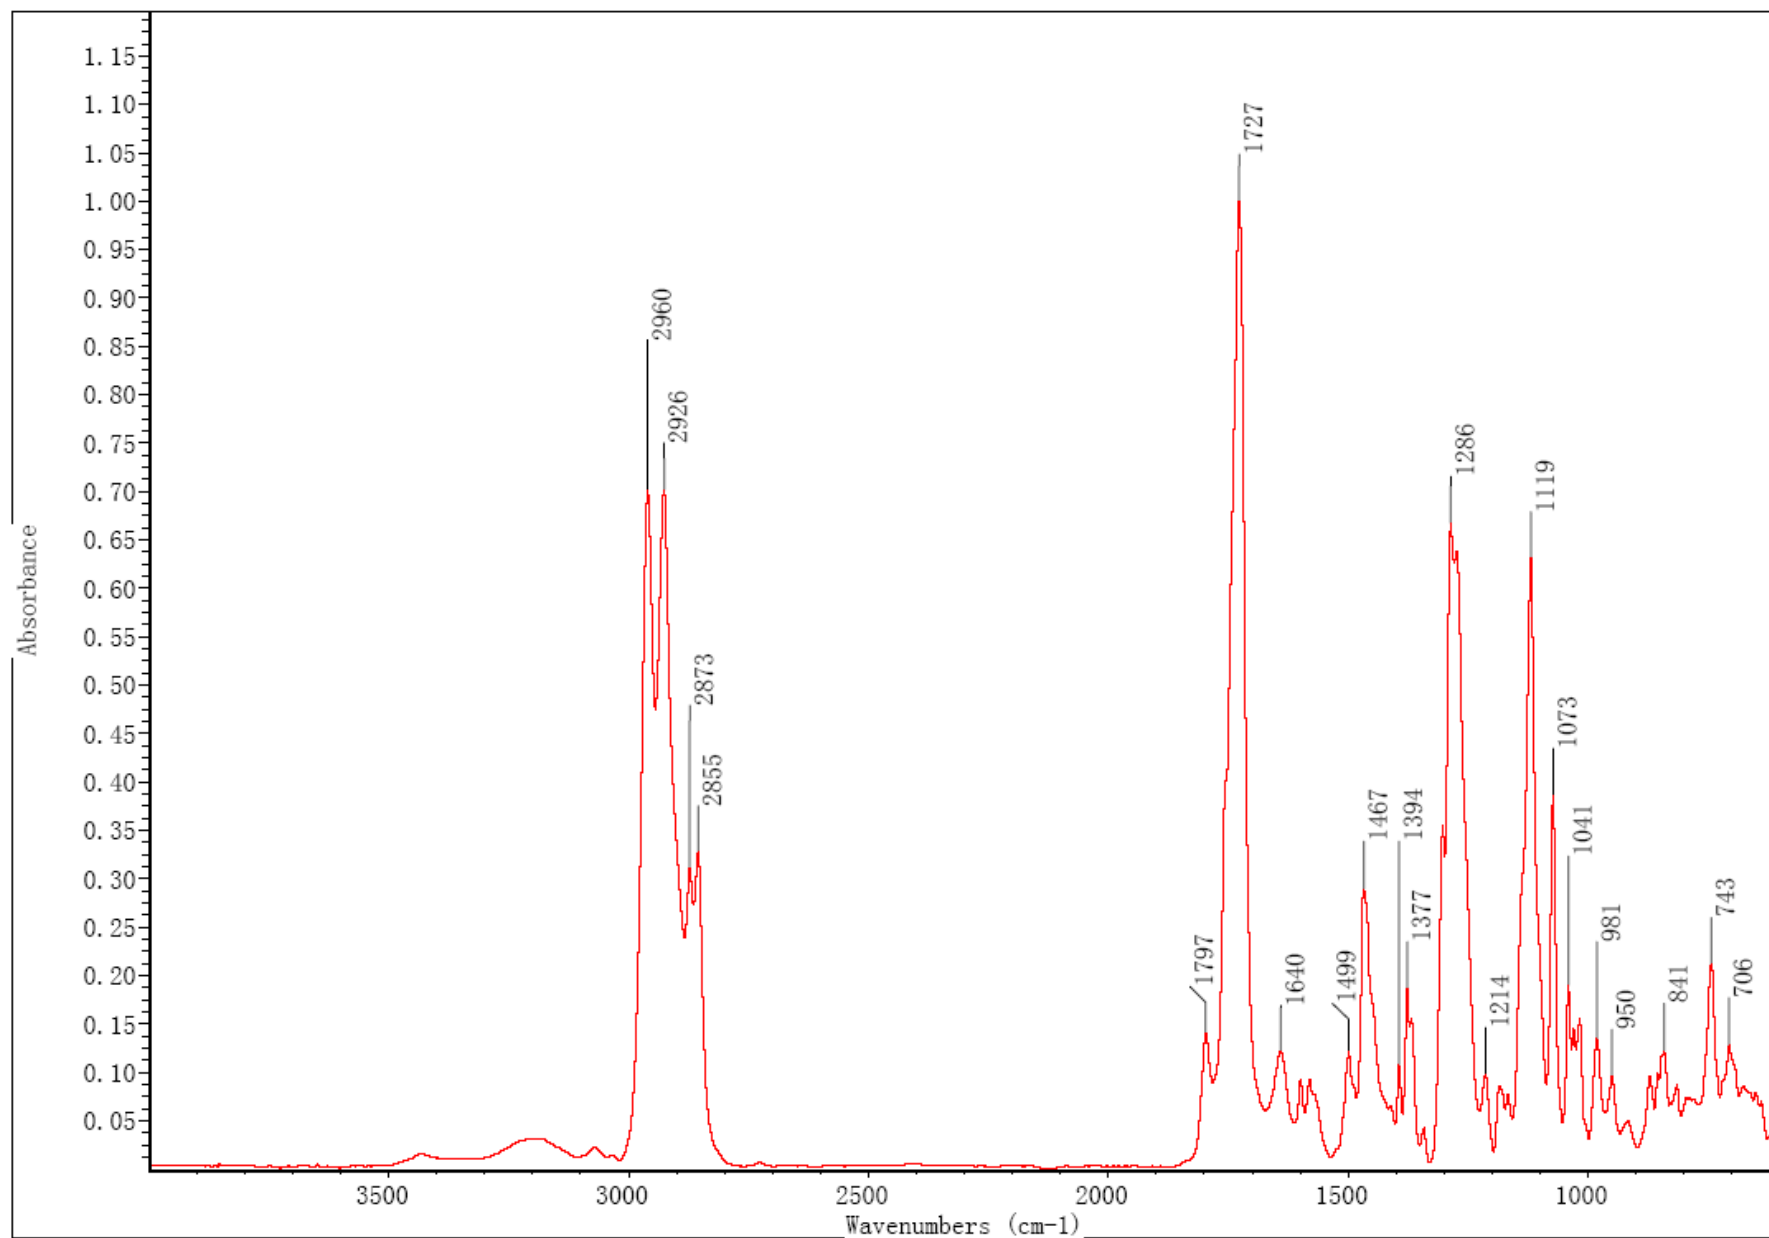

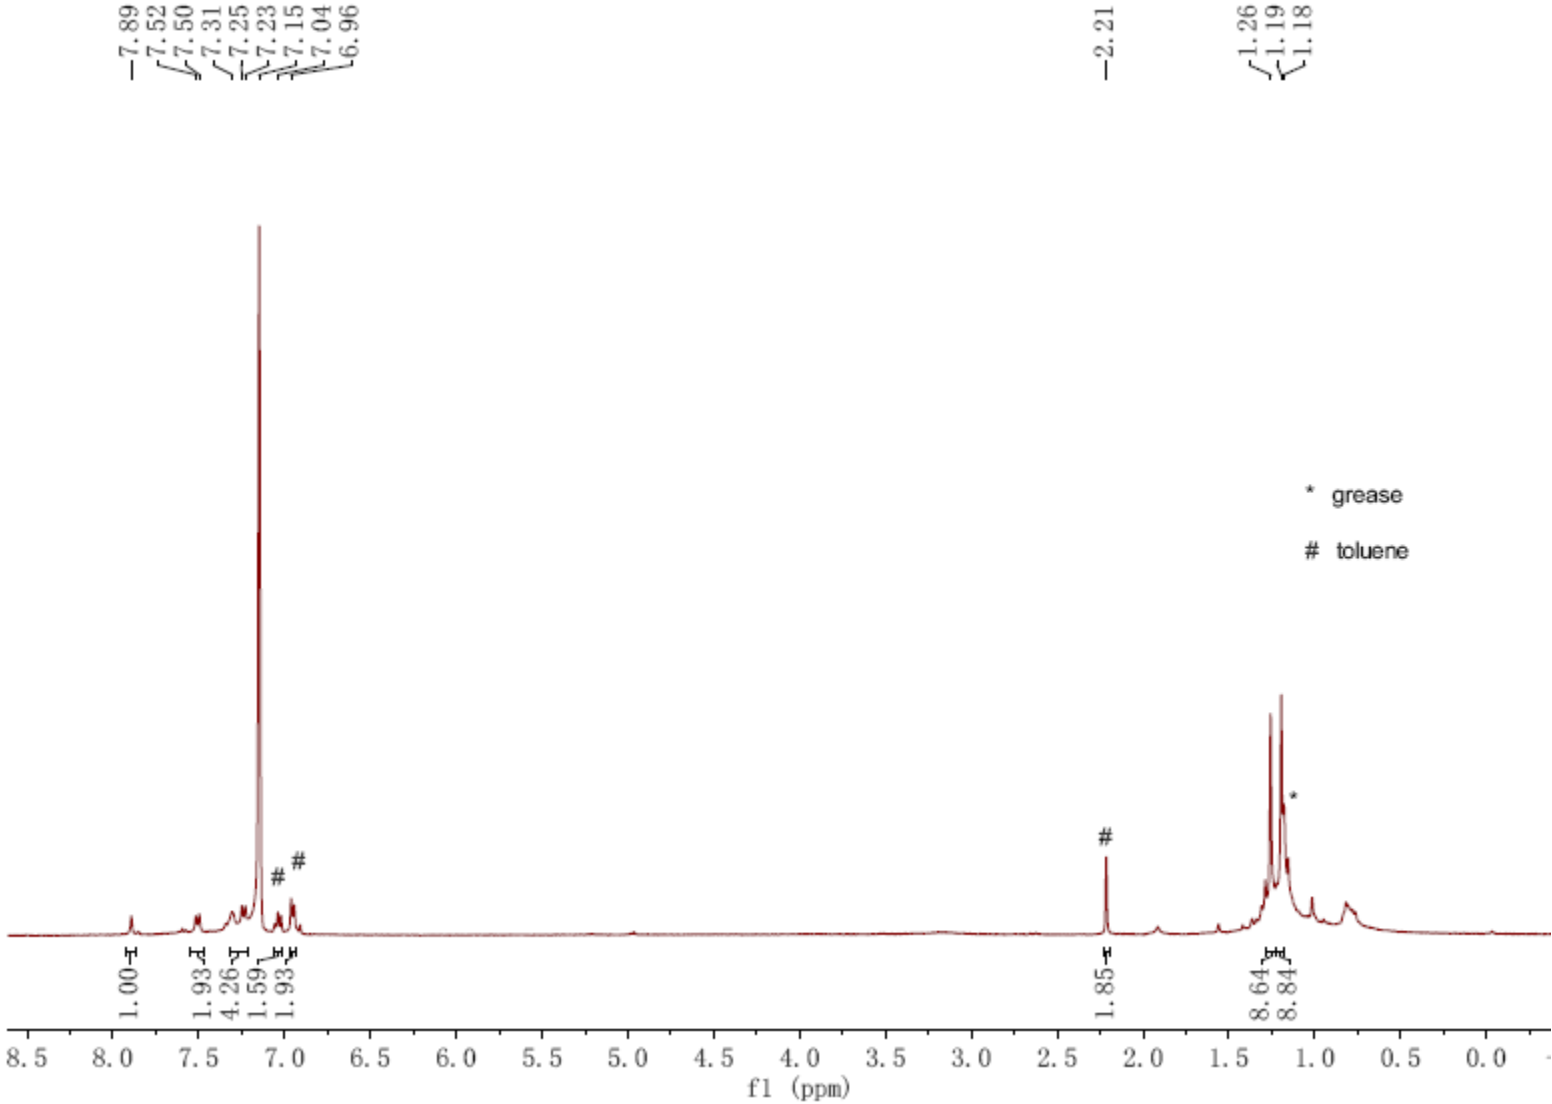

## Peking University Mass Spectrometry Sample Analysis Report

### Analysis Info

Analysis Name 10120220\_20101208\_000002.d  
Sample lsm-GreenMajor  
Comment ESI Positive

Acquisition Date 12/8/2010 3:09:55 PM  
Instrument Bruker Apex IV FTMS  
Operator Peking University

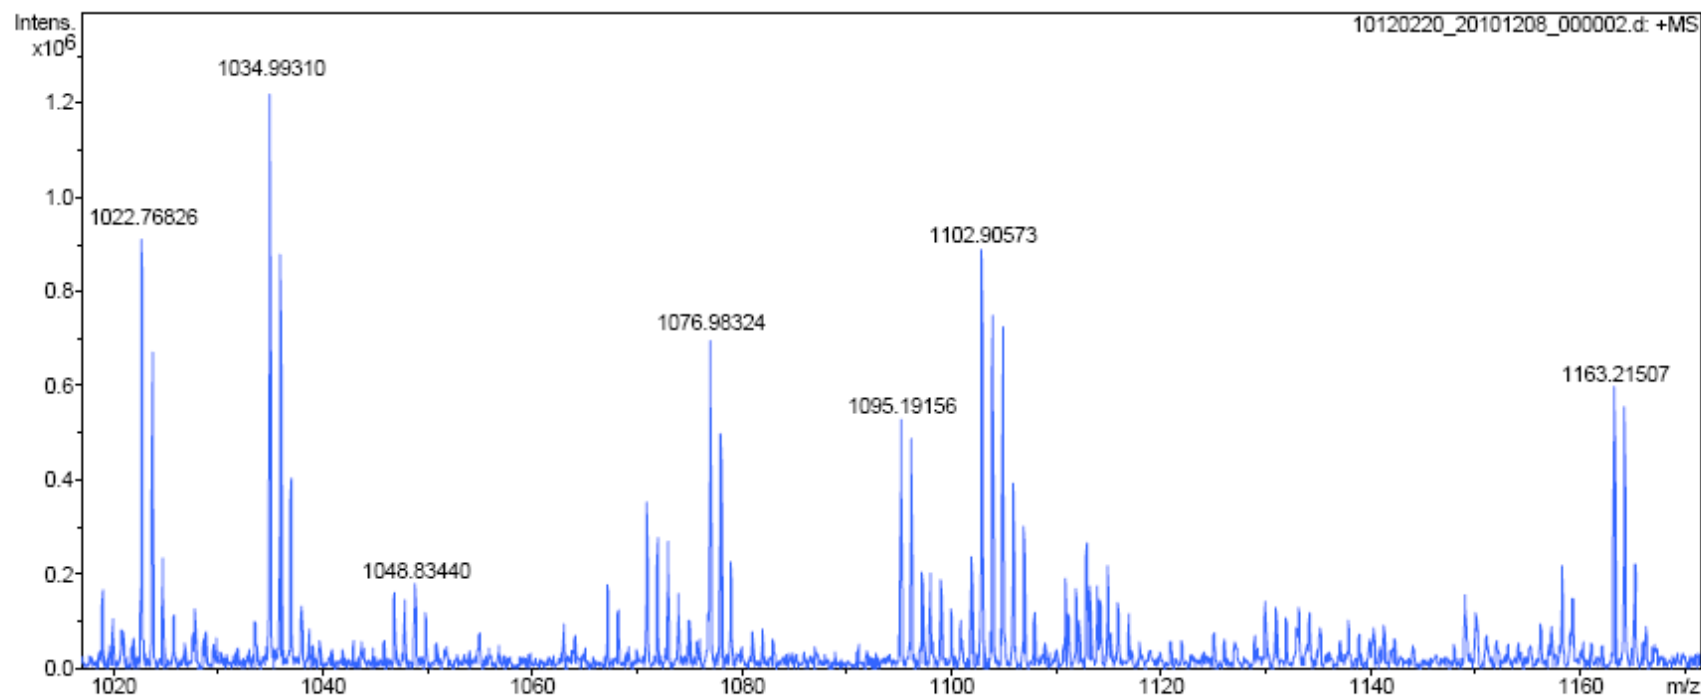

| Meas. m/z  | # | Formula           | Score  | m/z        | err [mDa] | err [ppm] | mSigma | rdb  | e <sup>-</sup> Conf | N-Rule |
|------------|---|-------------------|--------|------------|-----------|-----------|--------|------|---------------------|--------|
| 1095.19156 | 1 | C 80 H 27 N 2 O 5 | 100.00 | 1095.19145 | -0.1      | -0.1      | 53.8   | 68.5 | even                | ok     |

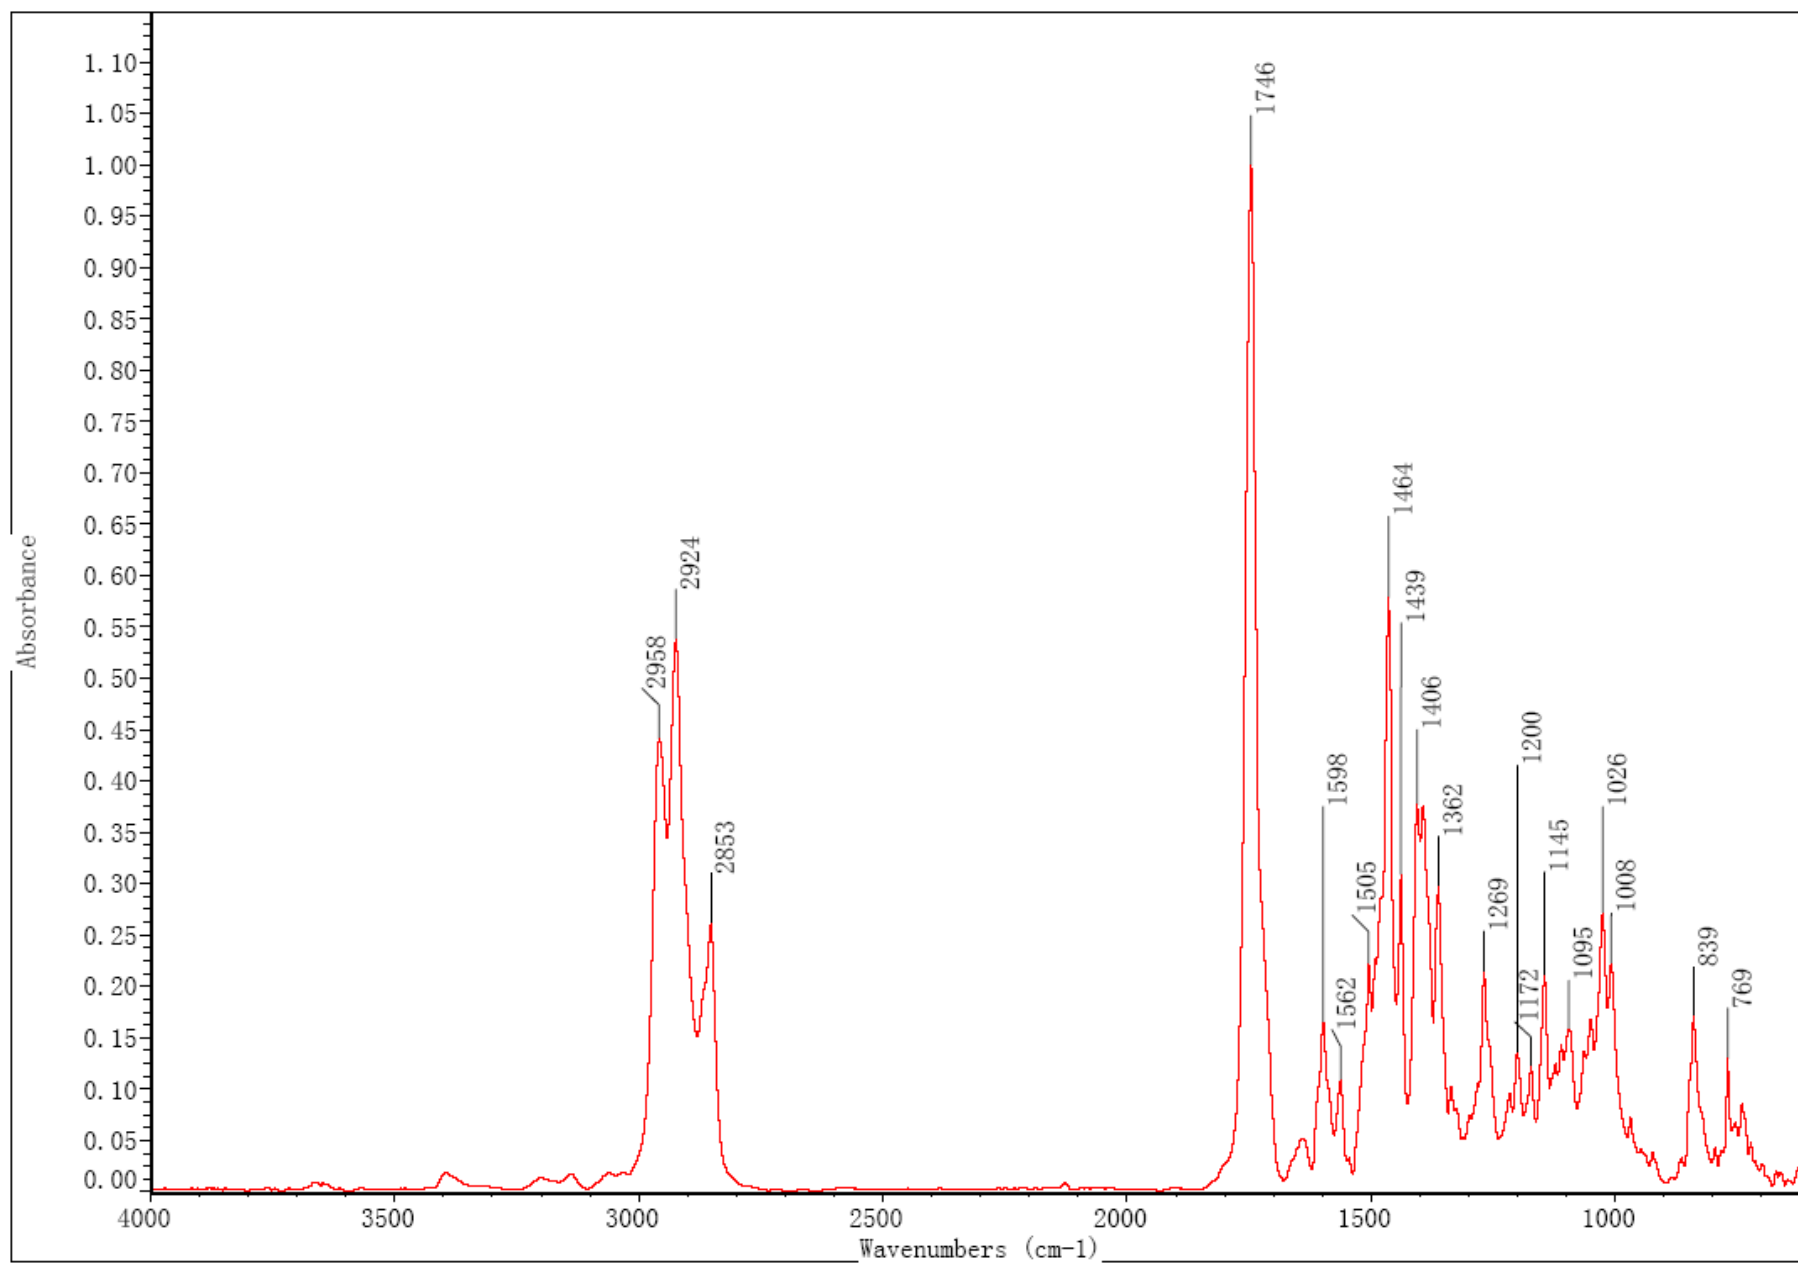

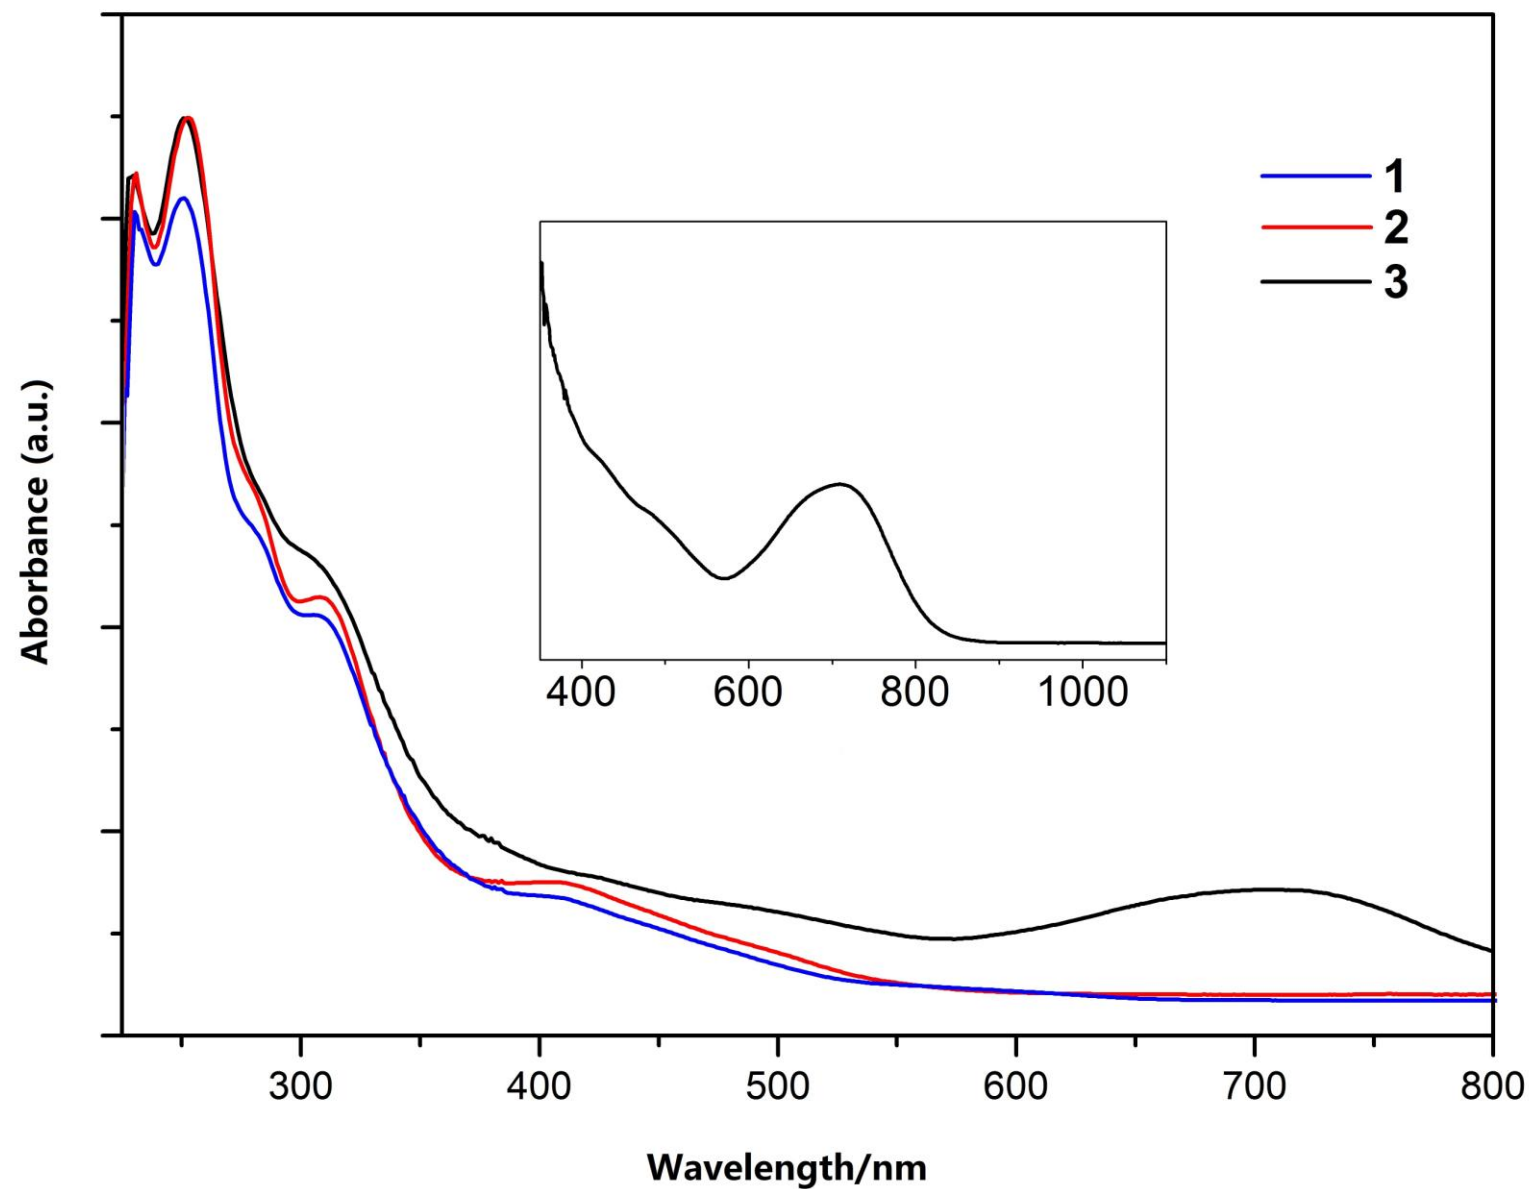

UV-Vis spectra in  $\text{CH}_2\text{Cl}_2$  at r.t.

### UV-Vis spectra in CH<sub>2</sub>Cl<sub>2</sub> at r.t.

| Compound | Concentration<br>mol/L | Wavelength nm | $\epsilon_m$      |
|----------|------------------------|---------------|-------------------|
| <b>1</b> | $6.0 \times 10^{-6}$   | 250           | $2.2 \times 10^5$ |
|          |                        | 304           | $1.0 \times 10^5$ |
| <b>2</b> | $5.9 \times 10^{-6}$   | 252           | $2.0 \times 10^5$ |
|          |                        | 307           | $9.2 \times 10^4$ |
| <b>3</b> | $0.47 \times 10^{-3}$  | 709           | $7.3 \times 10^3$ |
|          | $4.7 \times 10^{-6}$   | 251           | $1.6 \times 10^5$ |
|          |                        | 303           | $7.6 \times 10^4$ |
|          |                        | 709           | $1.5 \times 10^4$ |
|          | $4.7 \times 10^{-7}$   | 249           | $2.5 \times 10^5$ |
|          |                        | 307           | $1.1 \times 10^5$ |
|          |                        | 709           | $2.4 \times 10^4$ |

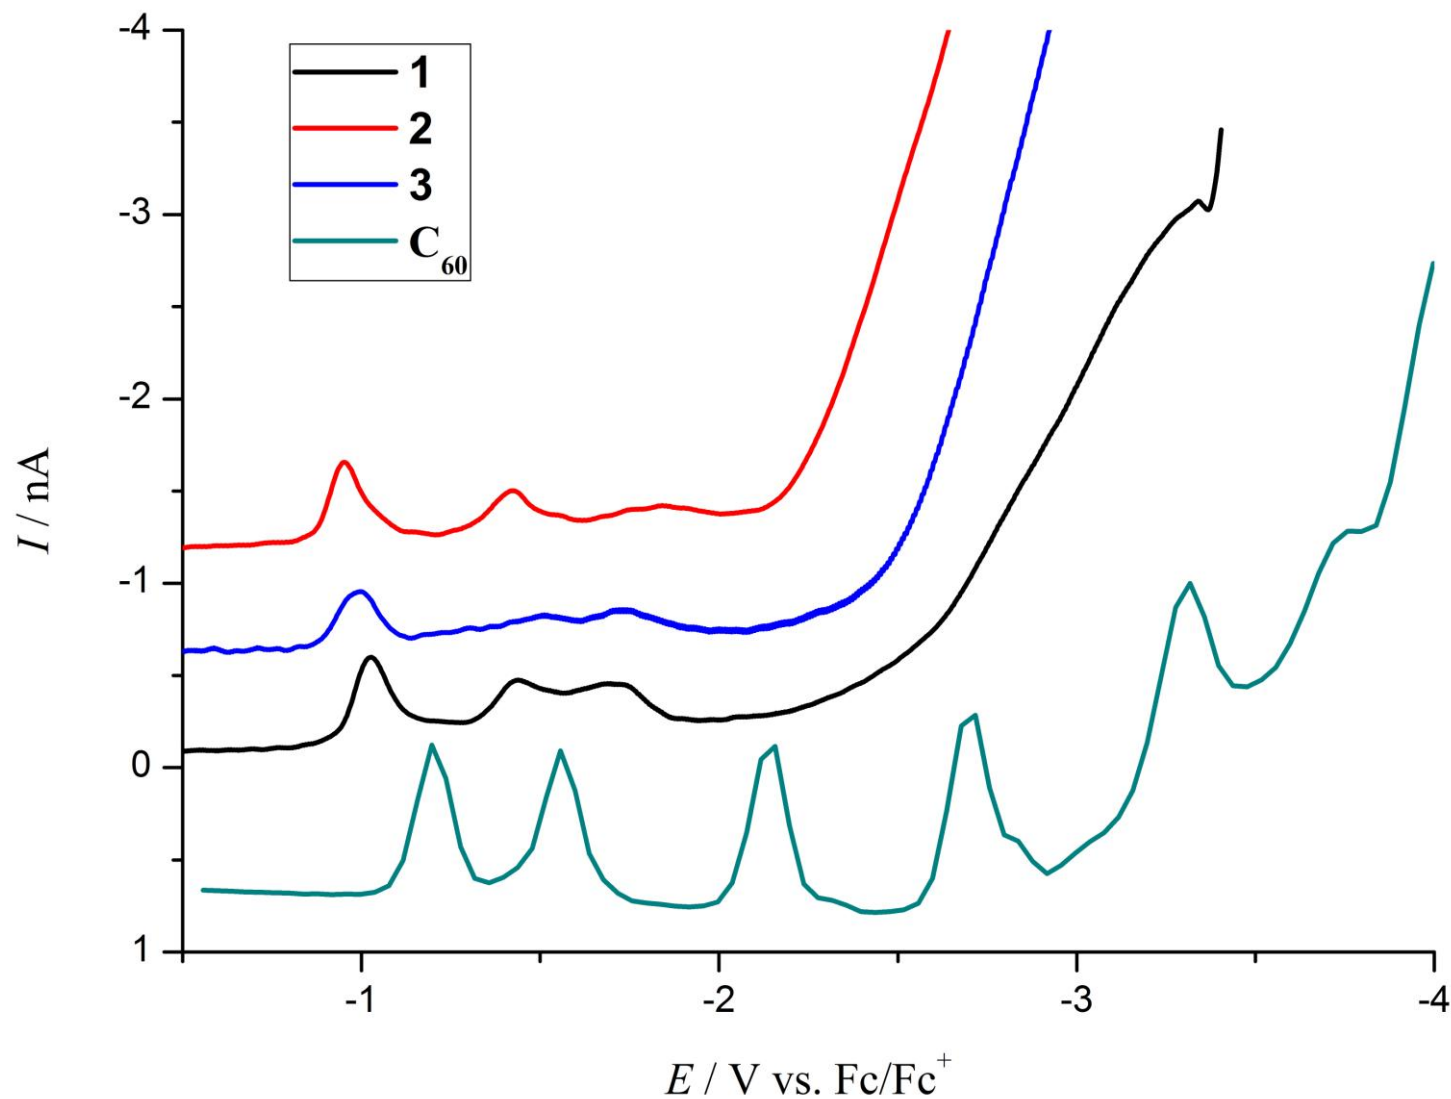

Conditions for DPV measurements: toluene solution containing 0.05 mol/L tetrahexylammonium bis (trifluoromethylsulfonyl) imide ( $\text{THA-Tf}_2\text{N}$ ) as supporting electrolyte, ferrocene (Fc) as an internal standard, platinum microelectrode (diameter 25  $\mu\text{m}$ ) as the working electrode, a platinum wire and a Ag wire as the counter and quasi-reference electrodes, respectively. Scan rate: 20  $\text{mVs}^{-1}$
